# Supplementary material
Source: Springer Nature journal article supplement (https://www.springermedizin.de/resource/supplementary/12890_2012_366_MOESM1_ESM.pdf/9505056)

Case.1

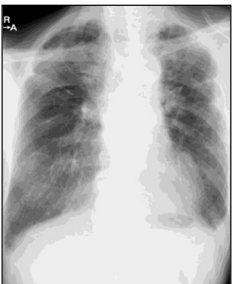

Case.2

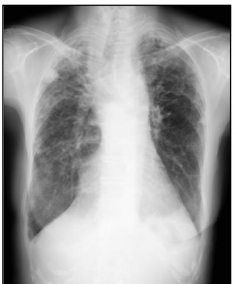

Case.3

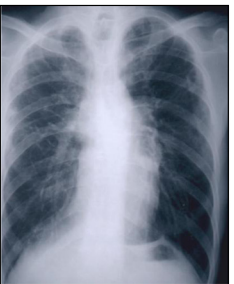

Case.4

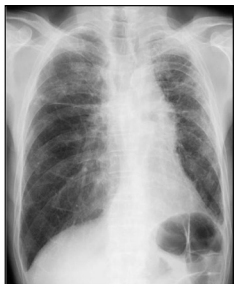

Case.5

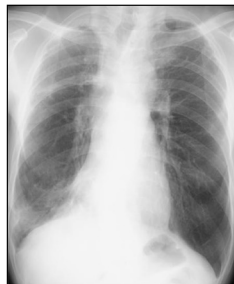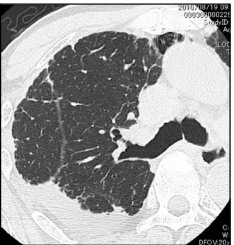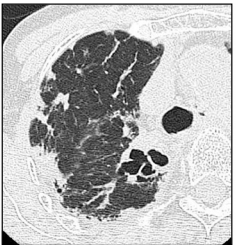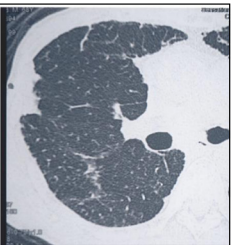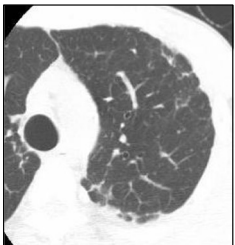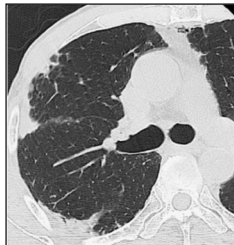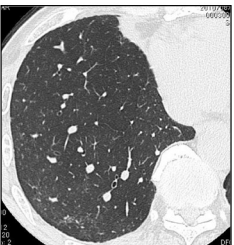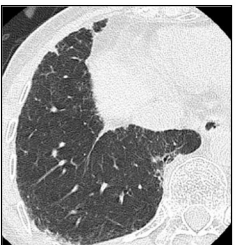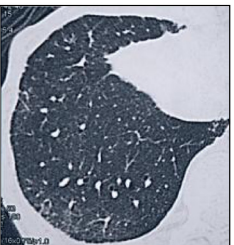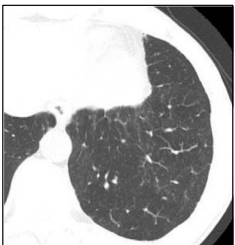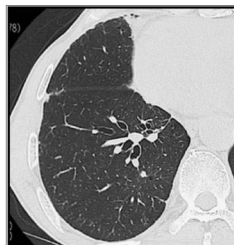

Supplement: MOESM1 [file 9505056]
